# Supplementary material for: External auditory exostoses in the Xuchang and Xujiayao human remains: Patterns and implications among eastern Eurasian Middle and Late Pleistocene crania
Source: PubMed Central journal article supplement (PMC5726651; doi:10.1371/journal.pone.0189390), 2017-12-12
Supplement: pone.0189390.s001.pdf [file pone.0189390.s001.pdf]

**External Auditory Exostoses in the Xuchang and Xujiayao Human Remains:  
Patterns and Implications among Eastern Eurasian Middle and Late  
Pleistocene Crania  
Supporting Information**

**Erik Trinkaus<sup>1</sup> and Xiujie Wu<sup>2</sup>**

<sup>1</sup> Department of Anthropology, Washington University, Saint Louis MO 63130, USA;  
trinkaus@wustl.edu

<sup>2</sup> Key Laboratory of Vertebrate Evolution and Human Origins, Institute of Vertebrate Paleontology and  
Paleoanthropology, Chinese Academy of Sciences, Beijing 100044, China. wuxiujie@ivpp.ac.cn

**S1 Text: External auditory exostoses in eastern Eurasian humans**

Tables S1 and S2 provide external auditory exostosis (EAE) observations on Middle Pleistocene archaic human crania and Late Pleistocene early modern human crania. Unless otherwise referenced, the observations were made by the authors on the original fossil specimens.

**S1 References**

1. Weidenreich F. Morphology of Solo man. *Anthropol Pap Am Mus Nat Hist.* 1951; 43(3):222-90.
2. Santa Luca AP. The Ngandong fossil hominids. *Yale Univ Pub Anthropol.* 1980; 78:1-175.
3. Weidenreich F. The skull of *Sinanthropus pekinensis*. *Palaeontol Sinica.* 1943; 10D:1-485.
4. Suzuki H. Skulls of the Minatogawa man. *Bull Univ Mus Univ Tokyo.* 1982; 19:7-49.

**Table S1.** External auditory exostoses in eastern Eurasian Middle Pleistocene archaic humans.

|              | <i>Side</i> | <i>EAM exostoses</i>                                                                                                    | <i>Grade</i> | <i>Source</i> <sup>1</sup> |
|--------------|-------------|-------------------------------------------------------------------------------------------------------------------------|--------------|----------------------------|
| Dali 1       | rt          | very small protrusion extending in from anterosuperior meatus, and small rounded knob in from posteroinferior tympanic  | 1            | CT                         |
|              | lt          | distinct rounded growth in from posterosuperior meatus inside of porous                                                 | 1            | CT                         |
| Hexian 1     | rt          | absent                                                                                                                  | 0            |                            |
|              | lt          | absent                                                                                                                  | 0            |                            |
| Jinniushan 1 | rt          | absent                                                                                                                  | 0            | cast                       |
| Ngandong 1   | rt          | absent                                                                                                                  | 0            | [1,2]                      |
| Ngandong 6   | lt          | posteroinferior inward swelling                                                                                         | 1            | [1,2]; cast                |
| Ngandong 7   | rt          | absent                                                                                                                  | 0            | [1,2]                      |
|              | lt          | absent                                                                                                                  | 0            | [1,2]                      |
| Ngandong 10  | rt          | anteroinferior protrusion                                                                                               | 1            | [1,2]                      |
| Ngandong 11  | rt          | absent                                                                                                                  | 0            | [1,2],cast                 |
|              | lt          | absent                                                                                                                  | 0            | [1,2],cast                 |
| Ngandong 12  | rt          | absent                                                                                                                  | 0            | [1,2]                      |
|              | lt          | posterior tympanic small exostosis                                                                                      | 1            | [1,2]                      |
| Yunxian      | lt          | small rounded knob in anterosuperior meatus, and several small rounded knobs in posterior superior and inferior meatus. | 1            |                            |
| ZKD Skull 5  | rt          | small knob anterosuperior and anteroinferior thickening with modest protrusion into meatus                              | 1            | [3]; cast                  |
|              | lt          | absent                                                                                                                  | 0            | [3]                        |
| ZKD Skull 10 | rt          | distinct superoanterior knob from anterior tympanic, into canal                                                         | 2            | [3]; cast                  |
| ZKD Skull 11 | lt          | absent; inferior tympanic thickening                                                                                    | 0            | [3]; cast                  |
| ZKD Skull 12 | lt          | anteroinferior thickening with a broad bulge into the meatus                                                            | 1            | [3]; cast                  |

<sup>1</sup> Unless otherwise indicated, observations are on the original specimens. CT: from CT scan of cranium; cast: from a cast of the specimen, taking into account any casting artifacts;

**Table S2.** External auditory exostoses in eastern Eurasian Late Pleistocene early modern humans.

|              | <i>Side</i> | <i>EAM Exostoses</i>                                                  | <i>Grade</i> | <i>Suorce</i> <sup>1</sup> |
|--------------|-------------|-----------------------------------------------------------------------|--------------|----------------------------|
| Gezi 1       | rt          | absent                                                                | 0            |                            |
| Jingcuan 1   | rt          | very small swelling in mid-posterior meatus                           | 1            |                            |
| Lijiang      | rt          | absent                                                                | 0            |                            |
| Liujiang 1   | rt          | small swelling in posterior mid-superior meatus                       | 1            | CT                         |
|              | lt          | distinct small rounded protrusion from posterior meatus               | 1            | CT                         |
| Minatogawa 1 | rt          | posteroinferior moderate cylinder along meatus                        | 1            | [4]; cast                  |
|              | lt          | absent                                                                | 0            | [4]; cast                  |
| Minatogawa 2 | rt          | medium growths mid-posterior and posteroinferior                      | 2            | [4]                        |
| Minatogawa 4 | rt          | three small knobs posterosuperior, posteroinferior and anteroinferior | 1            | [4]                        |
| Wajak 1      | rt          | absent                                                                | 0            |                            |
| ZKD-UC 101   | rt          | absent                                                                | 0            | cast                       |
|              | lt          | absent                                                                | 0            | cast                       |
| ZKD-UC 102   | rt          | small swelling on anterosuperior tympanic edge                        | 1            | cast                       |
| ZKD-UC 103   | rt          | small knobs posteroinferior and anterosuperior                        | 1            | cast                       |
|              | lt          | absent                                                                | 0            | cast                       |
| Ziyang 1     | lt          | absent                                                                | 0            |                            |

<sup>1</sup> Unless otherwise indicated, observations are on the original specimens. CT: from CT scan of cranium; cast: from a cast of the specimen, taking into account any casting artifacts;
